# Supplementary material
Source: HighWire-hosted journal article supplement (https://www.cmajopen.ca/highwire/filestream/89209/field_highwire_adjunct_files/5/open-2022-0006-6-at.pdf)
Supplement: open-2022-0006-6-at.pdf [file open-2022-0006-6-at.pdf]

# Appendix 6a. RCT Analysis Observed Values for Outcomes One Year Post-index Date

| Measure                                                         | Intervention Group (n=82)<br>Observed values | Control Group (n=74)<br>Observed values |
|-----------------------------------------------------------------|----------------------------------------------|-----------------------------------------|
| Acute hospitalizations, mean per patient (95% CI*)              | 0.49 (0.18, 0.79)                            | 0.34 (0.09, 0.59)                       |
| Emergency department visits, mean per patient (95% CI*)         | 0.94 (0.55, 1.33)                            | 0.92 (0.51, 1.33)                       |
| Costs<br>Mean \$ per patient (95% CI*)<br>Median \$ per patient | \$19,619 (\$12, 992, \$26,246)<br>\$7,845    | \$15,318 (\$8,517, \$22,118)<br>\$7,285 |
| 30-day hospital readmissions, N (N discharges)                  | 9 (32)                                       | 7 (28)                                  |
| 7-day follow-up with family physician<br>N (N discharges)       | 17 (32)                                      | 6 (28)                                  |

\*95% CI = 95% confidence interval

**Appendix 6b. Propensity-matched Analysis: Observed Values for Outcomes One Year Pre- and Post-index Date**

| <b>Measure</b>                                                                         | <b>Before Index Date</b><br>Observed values                                        | <b>After Index Date</b><br>Observed values                                         |
|----------------------------------------------------------------------------------------|------------------------------------------------------------------------------------|------------------------------------------------------------------------------------|
| Acute hospitalizations, mean per patient (95% CI*)<br>Intervention**<br>Comparators**  | 0.44 (0.23, 0.64)<br>0.37 (0.29, 0.45)                                             | 0.49 (0.18, 0.79)<br>0.25 (0.16, 0.33)                                             |
| Emergency department visits, mean per patient (95% CI*)<br>Intervention<br>Comparators | 1.34 (0.75, 1.93)<br>1.30 (1.04, 1.57)                                             | 0.94 (0.55, 1.33)<br>0.98 (0.74, 1.22)                                             |
| Costs, mean \$ per patient (95% CI*) [median]<br>Intervention<br>Comparators           | \$20,000 (\$13,895, \$26,106) [\$9,027]<br>\$18,171 (\$15,839, \$20,504) [\$9,075] | \$19,583 (\$12,968, \$26,197) [\$7,818]<br>\$16,467 (\$12,842, \$20,093) [\$5,061] |
| 30-day hospital readmissions, N (N discharges)<br>Intervention<br>Comparators          | 10 (42)<br>26 (153)                                                                | 7 (27)<br>17 (98)                                                                  |
| 7-day follow-up with family physician N (N discharges)<br>Intervention<br>Comparators  | 15 (44)<br>56 (157)                                                                | 16 (31)<br>29 (101)                                                                |

\*95% CI = 95% confidence interval

\*\* Intervention, n=82, Comparators n=401
